# Supplementary material for: High Diversity of Microcystin Chemotypes within a Summer Bloom of the Cyanobacterium Microcystis botrys
Source: MDPI journal article supplement (doi:10.3390/toxins11120698), 2019-12-01
Supplement: s1 [file s1]

## Supplementary Materials: High Diversity of Microcystin Chemotypes within a Summer Bloom of the Cyanobacterium *Microcystis botrys*

Emma Johansson, Catherine Legrand, Caroline Björnerås, Anna Godhe, Hanna Mazur-Marzec, Torbjörn Säll and Karin Rengefors

**Table S1.** Mean microcystin content (ng mg<sup>-1</sup> of dry weight) plus standard deviation of microcystin variants with standards.

| Strain prefix | Sampling Date | MC-LR         | MC-RR       | [Asp <sup>3</sup> , Dhb <sup>7</sup> ] MC-LR | [Dha <sup>7</sup> ]MC-RR | MC-YR         |
|---------------|---------------|---------------|-------------|----------------------------------------------|--------------------------|---------------|
| S1            | 2014-06-30    | 472.7 ± 82.3  | 117.0 ± 6.6 | 158.7 ± 9.2                                  | 135.7 ± 26.6             | 612.4 ± 87.6  |
| S2            | 2014-07-14    |               | 38.0 ± 2.8  |                                              |                          |               |
| S3            | 2014-08-03    |               | 36.3 ± 46.7 |                                              |                          | 177.7         |
| S4            | 2014-08-25    | 401.9 ± 151.2 | 73.6 ± 38.8 | 178.3 ± 34.5                                 | 101.7 ± 34.2             | 213.3 ± 133.7 |
| S5            | 2014-09-08    | 426.9 ± 65.2  | 74.4 ± 33.8 | 116.0 ± 26.7                                 | 82.7 ± 43.4              | 165.1 ± 132.4 |

**Table S2.** Water chemistry data from Lake Vomb, sampled by the Vomb Water Works. Note that sampling dates are different from *Microcystis* colony sampling.

| Sampling Date | Turbidity (FNU) | pH | Conductivity (mS m <sup>-1</sup> ) | Ammonium (μmol l <sup>-1</sup> ) | Nitrite (μmol l <sup>-1</sup> ) | Nitrate (μmol l <sup>-1</sup> ) | Phosphate-P (μg P l <sup>-1</sup> ) | Phosphate (μmol l <sup>-1</sup> ) | Fe (mg l <sup>-1</sup> ) | N:P (mol:mol) |
|---------------|-----------------|----|------------------------------------|----------------------------------|---------------------------------|---------------------------------|-------------------------------------|-----------------------------------|--------------------------|---------------|
| May 12        | 15              | 8  | 45                                 | 5                                | 1                               | 161                             | 6                                   | 0.19                              | 0.01                     | 864           |
| June 9        | 1.2             | 8  | 45                                 | 2.78                             | 1.2                             | 105                             | <5                                  | <0.16                             | <0.01                    | 675           |
| July 21       | 5.7             | 9  | 40                                 | 1.11                             | 0.8                             | <14                             | 13                                  | 0.42                              | 0.01                     | 39.1          |
| Aug 18        | 8.2             | 8  | 38                                 | 1.67                             | 0.2                             | <14                             | 68                                  | 2.2                               | 0.03                     | 7.5           |
| Sep 15        | 5.2             | 9  | 36                                 | <0.55                            | 0.2                             | <14                             | 56                                  | 1.8                               | 0.01                     | 8.4           |

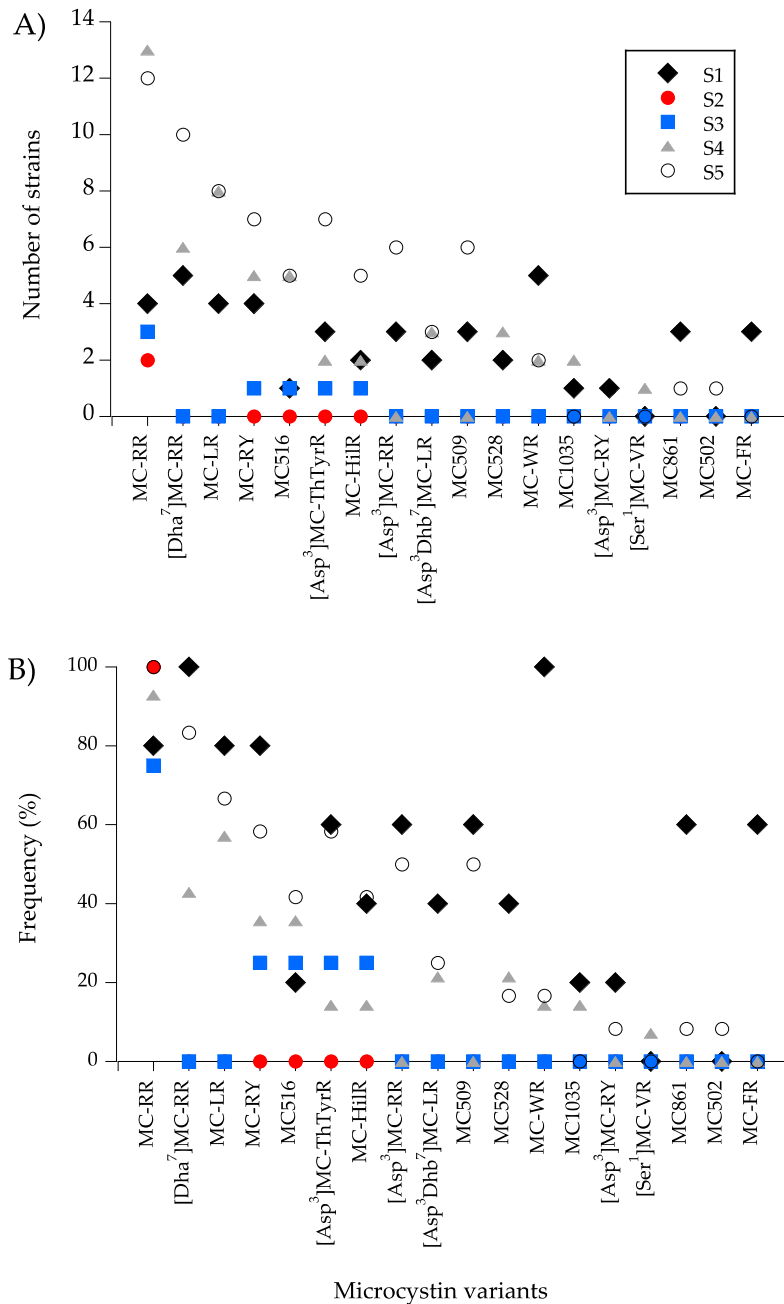

Figure S1: Prevalence of the 18 microcystin variants in sampled *M. botrys* strains, obtained by tandem mass spectrometry LC-MS/MS. (A) shows the absolute numbers of strains producing each microcystin variant within sampling occasions (S1–S5). (B) shows the frequencies (%) of strains producing each microcystin variant, within sampling occasions (S1–S5). Symbols denote sampling occasion: S1 = black diamonds, S2 = red circles, S3 = blue squares, S4 = grey triangles, S5 = open circles.

**Figure S1.** Prevalence of the 18 microcystin variants in sampled *M. botrys* strains, obtained by tandem mass spectrometry LC-MS/MS. (A) shows the absolute numbers of strains producing each microcystin variant within sampling occasions (S1–S5). (B) shows the frequencies (%) of strains producing each microcystin variant, within sampling occasions (S1–S5). Symbols denote sampling occasion: S1 = black diamonds, S2 = red circles, S3 = blue squares, S4 = grey triangles, S5 = open circles.

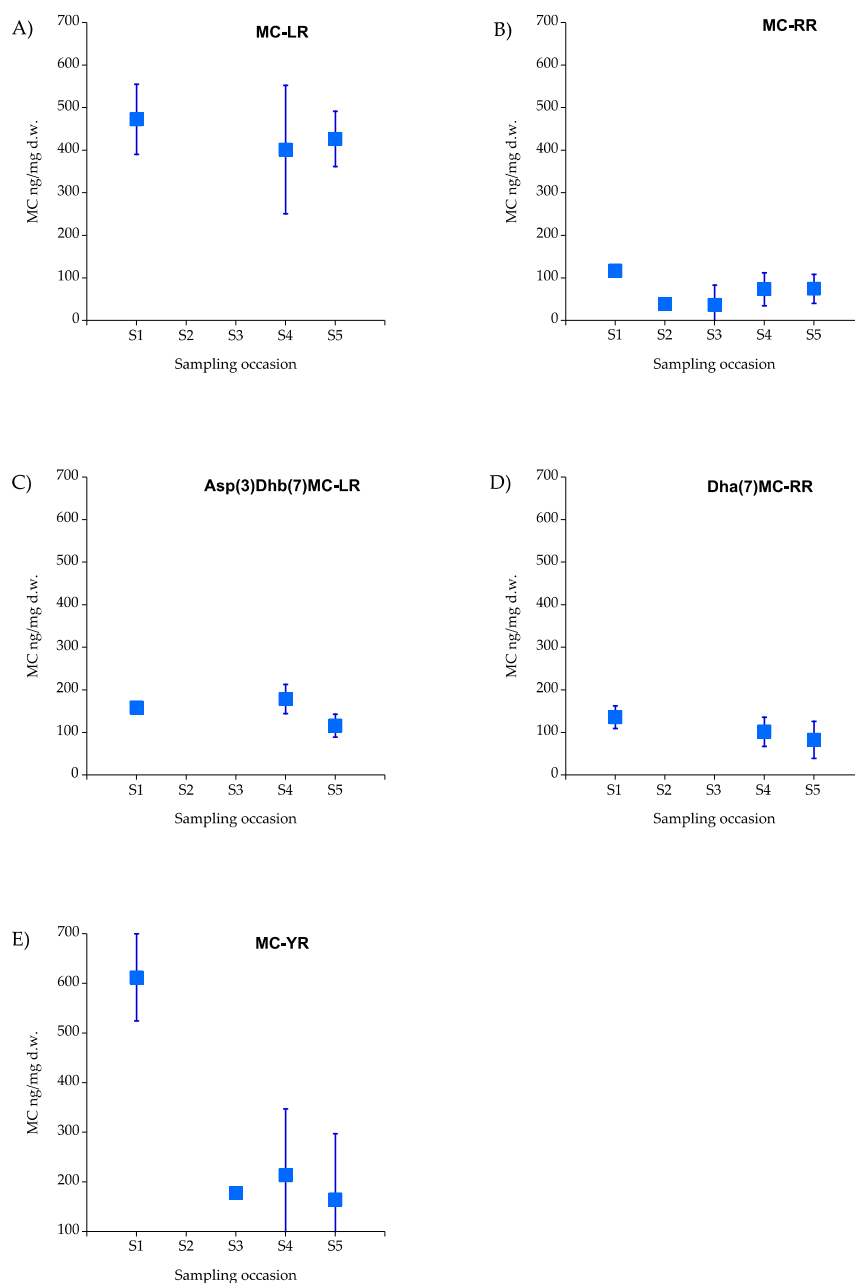

**Figure S2.** Microcystin content (MC ng mg<sup>-1</sup> dry weight) for sampled *M. botrys* strains sampled at S1-S5, and analyzed using tandem mass-spectrometry LC-MS/MS. Mean values are shown for MCs where standards were available. Error bars shows standard deviations. (A) MC-LR, (B) MC-RR, (C) [Asp3, Dhb7]MC-LR, (D) [Dha7]MC-RR, (E) MC-YR.
